# Supplementary material for: Gene expression in bumble bee larvae differs qualitatively between high and low concentration imidacloprid exposure levels
Source: Sci Rep. 2023 Jun 9;13:9415. doi: 10.1038/s41598-023-36232-y (PMC10256756; doi:10.1038/s41598-023-36232-y)
Supplement: Supplementary file 6 — Supplementary Table S5. [file 41598_2023_36232_MOESM6_ESM.xlsx]

## Sheet: Hoja1
Supplementary Table S5. Enriched gene ontology (GO) terms. Columns show the GO term identification number, the GO term name, the number of genes with that GO term assigned in the genome, the number of genes with that GO term assigned in the analyzed DEG set, the expected ratio between the annotated and significant columns, the adjusted P-value of the test and the set of differentially expressed g…
GO.ID	Term	Annotated	Significant	Expected	P-value	DEG set
GO:0032543	mitochondrial translation	105	31	3.57	1.3328e-16	0.7 ppb Down-regulated
GO:0006626	protein targeting to mitochondrion	37	12	1.26	2.22133e-06	0.7 ppb Down-regulated
GO:0009060	aerobic respiration	42	13	1.43	2.22133e-06	0.7 ppb Down-regulated
GO:0006260	DNA replication	119	24	4.04	2.39488e-06	0.7 ppb Down-regulated
GO:0006754	ATP biosynthetic process	41	9	1.39	0.0059143	0.7 ppb Down-regulated
GO:0042775	mitochondrial ATP synthesis coupled elec...	58	10	1.97	0.0145775	0.7 ppb Down-regulated
GO:0006271	DNA strand elongation involved in DNA re...	20	6	0.68	0.02261	0.7 ppb Down-regulated
GO:0002181	cytoplasmic translation	126	23	6.96	0.0012495	0.7 ppb Up-regulated
GO:0032543	mitochondrial translation	105	56	8.14	4.165e-27	7.0 ppb Down-regulated
GO:0006626	protein targeting to mitochondrion	37	21	2.87	2.70725e-11	7.0 ppb Down-regulated
GO:0006271	DNA strand elongation involved in DNA re...	20	14	1.55	8.46883e-09	7.0 ppb Down-regulated
GO:0006260	DNA replication	119	44	9.23	1.666e-06	7.0 ppb Down-regulated
GO:0006754	ATP biosynthetic process	41	17	3.18	1.87425e-06	7.0 ppb Down-regulated
GO:0009060	aerobic respiration	42	18	3.26	1.87425e-06	7.0 ppb Down-regulated
GO:1990542	mitochondrial transmembrane transport	48	18	3.72	3.808e-06	7.0 ppb Down-regulated
GO:0044743	protein transmembrane import into intrac...	33	14	2.56	2.60312e-05	7.0 ppb Down-regulated
GO:0006457	protein folding	92	23	7.14	0.000152717	7.0 ppb Down-regulated
GO:0000398	mRNA splicing, via spliceosome	237	41	18.38	0.00037485	7.0 ppb Down-regulated
GO:0007007	inner mitochondrial membrane organizatio...	17	9	1.32	0.000492227	7.0 ppb Down-regulated
GO:0042775	mitochondrial ATP synthesis coupled elec...	58	16	4.5	0.00177012	7.0 ppb Down-regulated
GO:0006270	DNA replication initiation	25	10	1.94	0.00262715	7.0 ppb Down-regulated
GO:0000727	double-strand break repair via break-ind...	12	7	0.93	0.00270725	7.0 ppb Down-regulated
GO:0043039	tRNA aminoacylation	42	13	3.26	0.00277667	7.0 ppb Down-regulated
GO:0033260	nuclear DNA replication	21	9	1.63	0.00312375	7.0 ppb Down-regulated
GO:0042254	ribosome biogenesis	199	35	15.43	0.006615	7.0 ppb Down-regulated
GO:0016072	rRNA metabolic process	148	28	11.48	0.00717306	7.0 ppb Down-regulated
GO:0033108	mitochondrial respiratory chain complex ...	35	11	2.71	0.00898763	7.0 ppb Down-regulated
GO:0009267	cellular response to starvation	73	17	5.25	0.0229075	7.0 ppb Up-regulated
GO:0016236	macroautophagy	84	19	6.04	0.0229075	7.0 ppb Up-regulated
GO:0009062	fatty acid catabolic process	30	10	2.16	0.037485	7.0 ppb Up-regulated
GO:0040003	chitin-based cuticle development	94	7	0.26	1.41785e-05	0.7 ppb vs 7.0 ppb Up-regulated
